# Supplementary material for: Implementation of Fluorescent-Protein-Based Quantification Analysis in L-Form Bacteria
Source: MDPI journal article supplement (doi:10.3390/bioengineering11010081), 2024-01-15
Supplement: s1 [file s1]

## Supplemental Figures (S1–S7) and Table S1

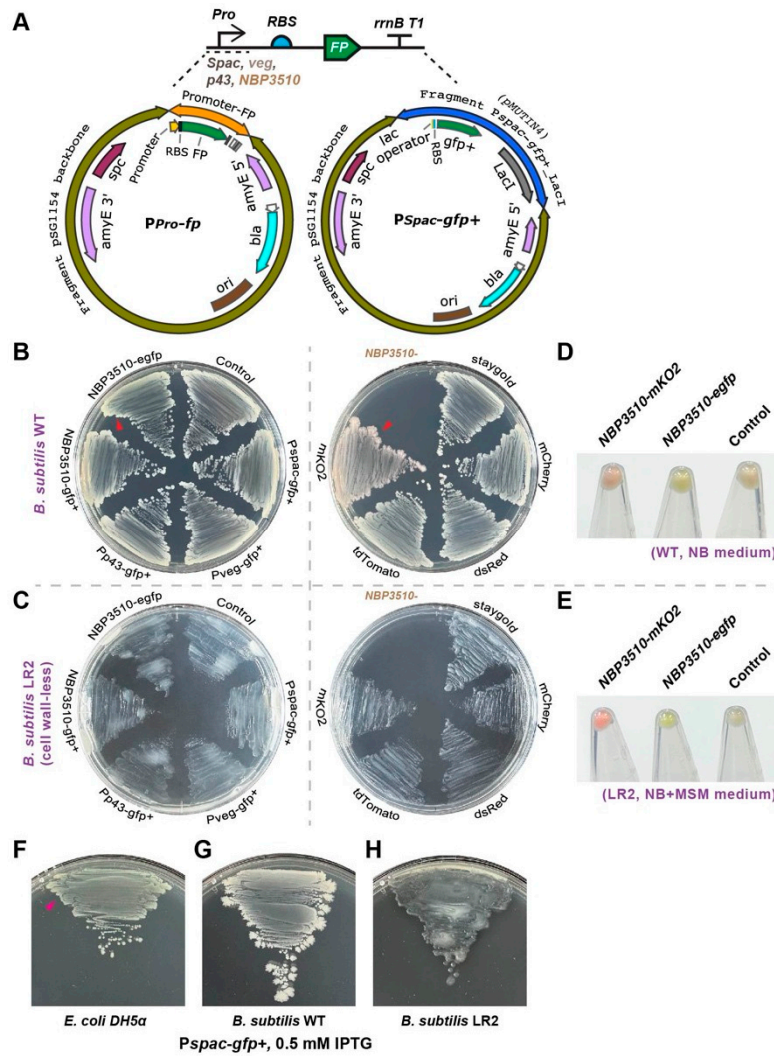

**Figure S1.** Plasmid construction and direct observation of expressed FPs in *B. subtilis* WT and L-form LR2. (A) Construction of the fluorescent protein (FP) expressing vectors (*PPro-fp* and *PSpac-gfp+*) under various constitutive promoters (*Pro*: *Pveg*, *P43*, and *NBP3510*) and IPTG-inducible promoter *Spac*. (B) All generated FP-expressing strains of *B. subtilis* WT (B) and LR2 (C) were grown on NA plate or NA/MSM plate, respectively. The red arrow represents apparent red or green colony in the *NBP3510-egfp* or *NBP3510-mKO2* WT strain. Cell pellets from indicated strains cultured in liquid medium were also collected for comparisons (D&E). Comparison of different fluorescent strains with *PSpac-gfp+* in the presence of IPTG (F–H). (F) *E. coli* DH5α strain containing *PSpac-gfp+* was grown on LB plate with 0.5mM IPTG, the red arrowhead indicates the apparent green color. *B. subtilis* WT (G) and LR2 (H) strain containing *PSpac-gfp+* was grown on NA or NA/MSM plate with 0.5 mM IPTG, respectively.

*Pspac*: *ttgtgagcggataacaat**taagcttaaggaggt*  
*Pveg*: *aattttgtcaaaaataattttattgacaacgtcttattataacggtgatataatttaaa*  
*ttttattttgacaaaaatggcgtcgtttgtacaataaatgt**tactagagaaaggtggtgaa*  
*Pp43*: *attttacatttttagaatggcgtgaaaaaaacgcgcgattatgtaaaaatataa*  
*tactagagaaaggtggtgaa*  
*NBP3510*: *acttctcaaaatcccatttaaaaaatttttttaaaaaaatatttgacatttttaa*  
*ataaagcgtttataatataatgtagaacaacaaaggaggagattttgtttgacaaa*  
*gtagaacgt**gattaactaataaggaggacaaac*

**Promoter sequence**  
**RBS sequence**

**Figure S2.** The sequence of different promoters used in this study. The promoter and RBS sequences were marked with underline and italics, respectively.

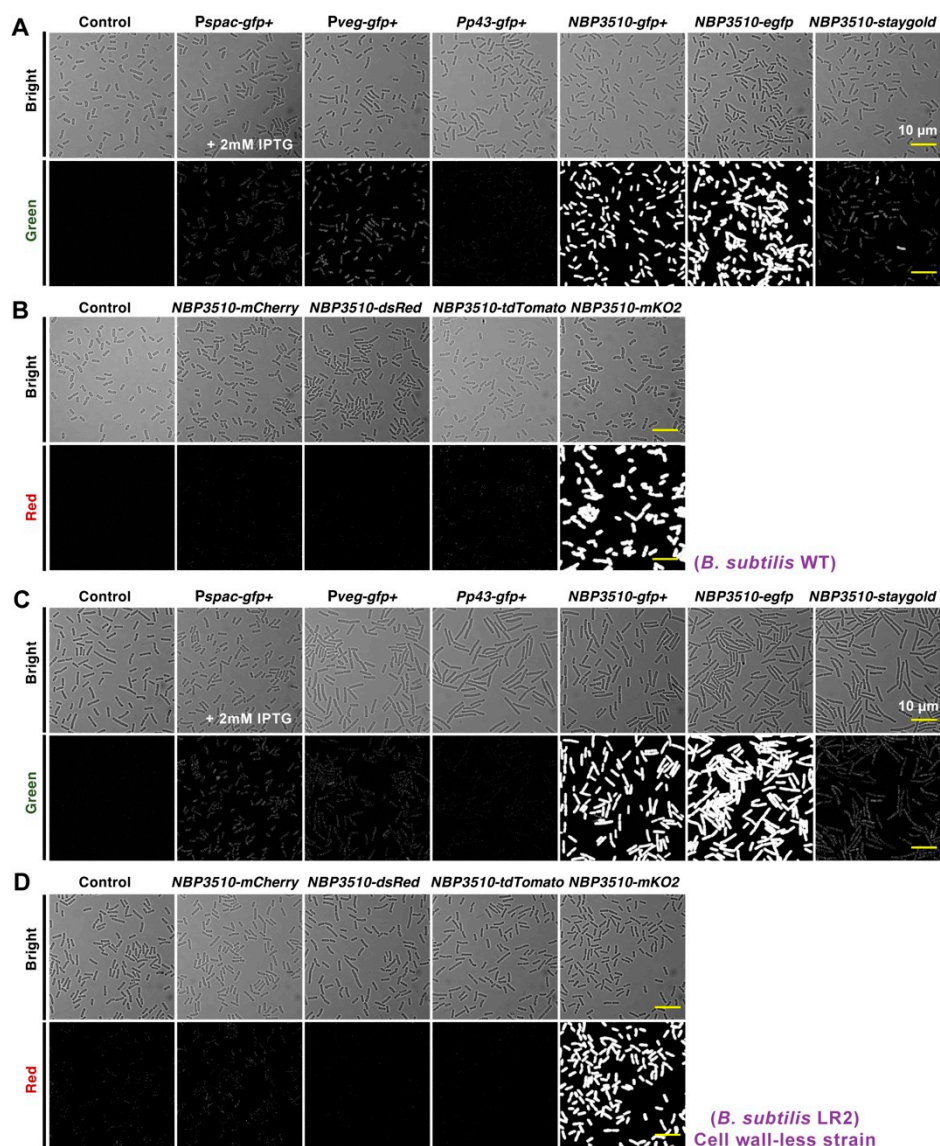

**Figure S3.** Microscope images of all constructed fluorescent strains. Images of tested green (A) and red (B) fluorescent strains in *B. subtilis* WT. Images of all tested green (C) and red (D) fluorescent strains in *B. subtilis* LR2. All bacteria were grown to late logarithmic phase in C minimal medium (CMM). Scale bar = 10  $\mu$ m.

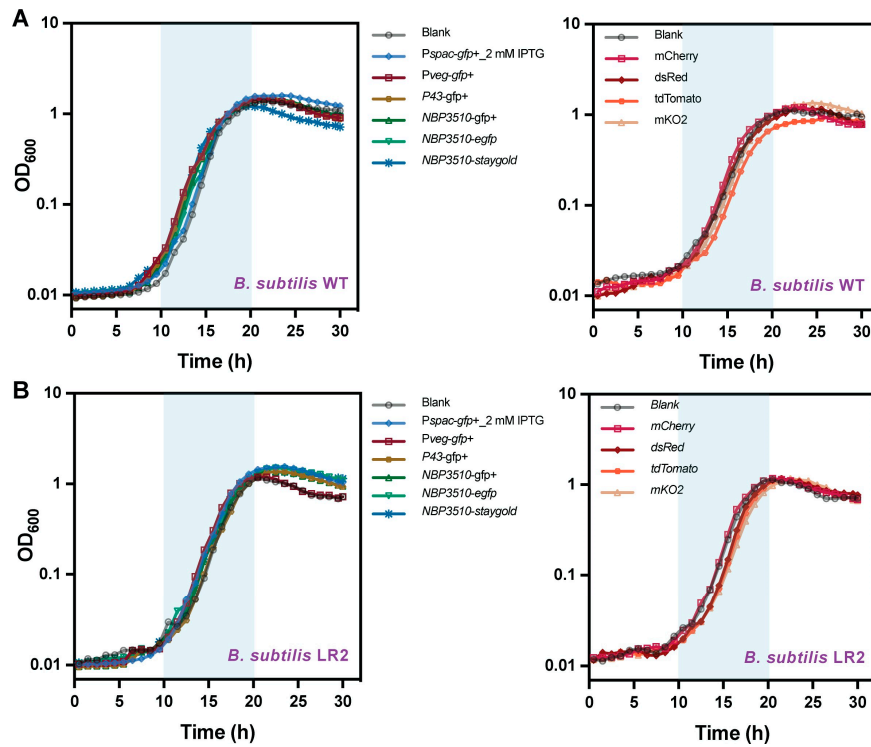

**Figure S4.** Growth curve of all strains used in this study. The growth curve (OD<sub>600</sub>) for all stains expressing green (left panel) or red (right panel) fluorescent proteins in *B. subtilis* WT (A) and L-form LR2 (B) were shown.

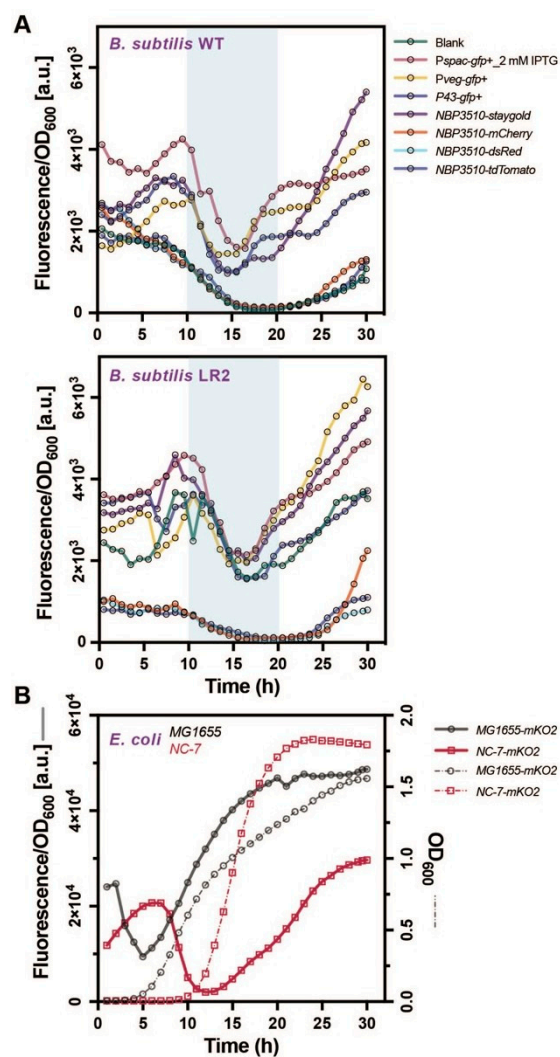

**Figure S5.** The expressions of fluorescent proteins in *B. subtilis* WT, L-form LR2, *E. coli* MG1655 and L-form NC-7. (A) The fluorescent expression level and pattern measured by the microplate reader in *B. subtilis* WT (upper panel) and L-form LR2 (lower panel). (B) The fluorescent expression level and growth pattern in *E. coli* MG1655 and L-form NC-7.



**Table S1** List of primers used in this study

| Name                   | Sequence (5' to 3')                     |
|------------------------|-----------------------------------------|
| <i>Pspac</i> F1        | gtgatgataagtgggaaggac                   |
| <i>Pspac</i> R1        | gctttcgtatgtagcatcac                    |
| <i>Promoter</i> F1     | gactatattcaaaggtgaaagcactcg             |
| <i>Promoter</i> R1     | gtacctctagatgcttcaccacct                |
| <i>Promoter</i> F2     | gtttgtcgggaacgctctctac                  |
| <i>Promoter</i> R2     | cgcgattccaatgaggttaagag                 |
| <i>gfp</i> + R1        | ccgtatgtagcatcaccttcacc                 |
| <i>egfp</i> R1         | ccgtatgttgcacaccttcac                   |
| <i>staygold</i> R1     | ccatgacatcggtagttttccac                 |
| <i>mCherry</i> R1      | cttgagccgtacatgaactgag                  |
| <i>dsRed</i> R1        | ggaaggacagcttcattgtagtcg                |
| <i>tdTomato</i> R1     | catgttgtgtcctcggaggag                   |
| <i>mKO2</i> R1         | cgcgtagtgtcatctcttgatg                  |
| <i>gfp</i> + F2        | ccgttcaactagcagaccattatc                |
| <i>egfp</i> F2         | cggttcaactagcagaccattatc                |
| <i>staygold</i> F2     | gatgtcccatatcactggattcg                 |
| <i>mCherry</i> F2      | ctgaggtcaagaccacctacaagg                |
| <i>dsRed</i> F2        | caaccactacgtggactccaag                  |
| <i>tdTomato</i> F2     | ctcctccgaggacaacaacatg                  |
| <i>mKO2</i> F2         | gattcttgaaatgccaggagacc                 |
| <i>transform</i> F3    | cgcgaattatcaagctctgagc                  |
| <i>transform</i> R3    | cgaggggaagcggttcacagtttc                |
| <i>transform</i> F4    | catcattaatcatccttcagg                   |
| <i>transform</i> R4    | gctgaccgttagcgtttaagtac                 |
| <i>HM-pUC19</i> F      | gtgcccttaaacgccctgtcagaccaagttaactcat   |
| <i>HM-pUC19</i> R      | gagaagtgcattgctccagtcgggaaacctgtcgtg    |
| <i>HM-Ppro-mKO2</i> -F | ccgactggaagcatgcacttctcaaagatcca        |
| <i>HM-Ppro-mKO2</i> -R | gtgtgacgttctgcggccgctctagaaccggaac      |
| <i>HM-pETcoco-1</i> -F | ctagagcggccgcagaacgtcacaccgtcagcag      |
| <i>HM-pETcoco-1</i> -R | cttggtctgacaggcggtttaagggcaccaataactgcc |
| <i>Fragment 3+1</i> F1 | ctggcgattcaggttcattcatgc                |
| <i>Fragment 3+1</i> R1 | gaagaacagtatgtgtatctgcgctc              |
| <i>Fragment 1+2</i> F2 | gcgttatccctgattctgtgg                   |
| <i>Fragment 1+2</i> R2 | ctaagtcaaacgcgaaaggcattg                |
| <i>Fragment 2+3</i> F3 | ggtcgacgggtatcgataagcttg                |
| <i>Fragment 2+3</i> R3 | cttacgtgccgatcaacgtctc                  |
